# Supplementary material for: HDAC inhibitor AR-42 decreases CD44 expression and sensitizes myeloma cells to lenalidomide
Source: Oncotarget. 2015 Sep 25;6(31):31134–50. doi: 10.18632/oncotarget.5290 (PMC4741593; doi:10.18632/oncotarget.5290)
Supplement: Supplementary file 1 [file oncotarget-06-31134-s001.pdf]

## SUPPLEMENTARY FIGURES AND TABLES

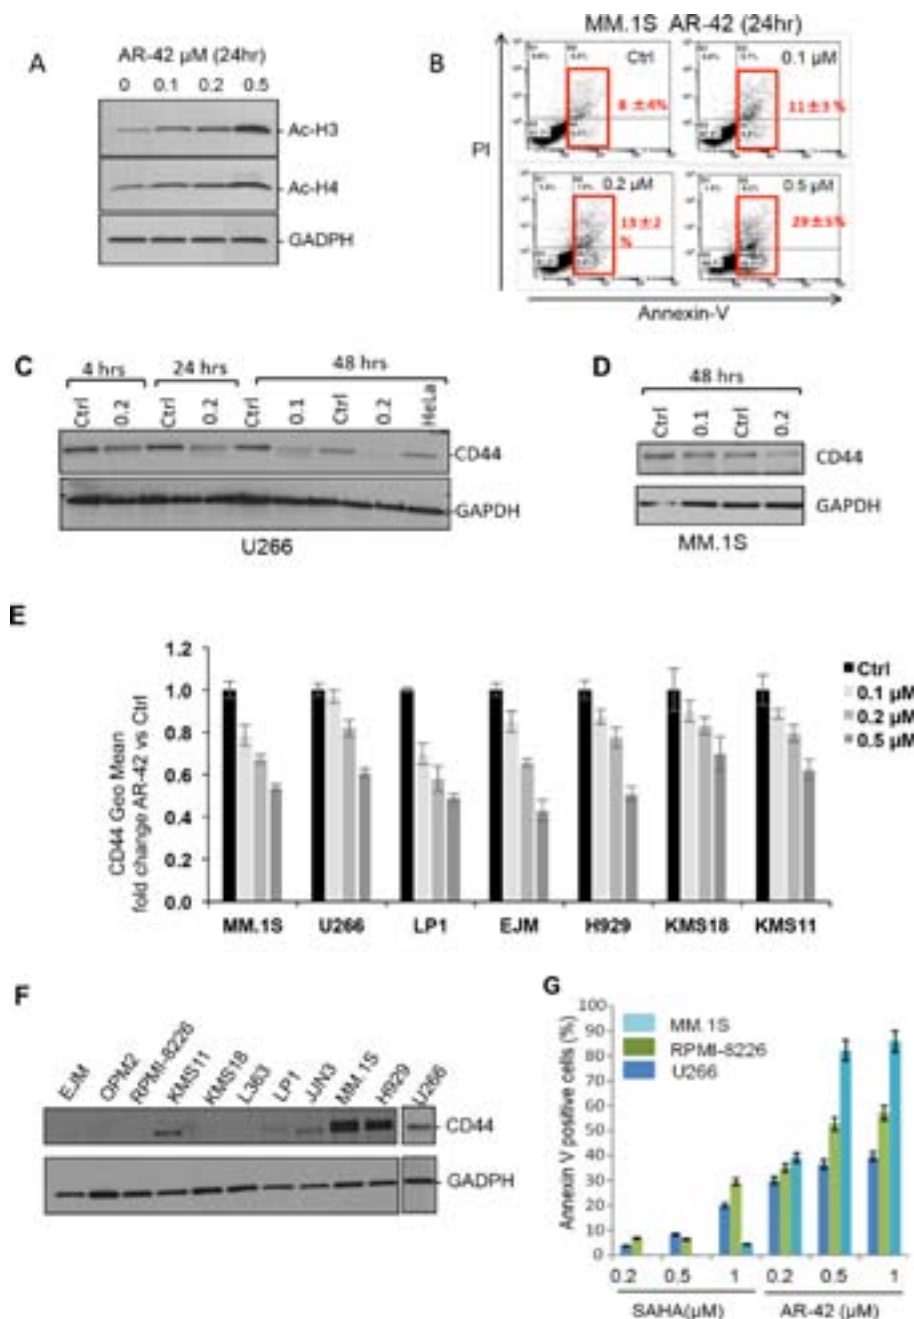

**Supplementary Figure S1: *In vitro* effects of AR-42 in MM cell lines.** **A.** Immunoblot analysis of acetyl histone H3 and H4 expression in MM.1S cells treated with 0.1–0.5  $\mu$ M AR-42 for 24 hrs. GAPDH was used as a loading control. **B.** Induction of apoptosis in MM.1S treated with 0.1, 0.2 and 0.5  $\mu$ M AR-42 for 24 hrs, measured by Annexin V-PI staining and flow cytometric analyses. The data are shown as mean  $\pm$  SD of three independent experiments. **C–D.** CD44 expression by western blotting of U266 (C) and MM.1S (D) treated with indicated concentrations of AR-42 ( $\mu$ M). GAPDH was used as an internal loading control. HeLa cells were used as positive control. **E.** Flow cytometric analyses of CD44 expression in LP1, MM.1S, H929, EJM, KMS11 and U266 cell lines treated with AR-42 (0.1, 0.2 and 0.5  $\mu$ M) for 48 hrs. Data are expressed as fold change of Annexin V geo mean compared to the untreated control. **F.** Western blotting analysis of the CD44 protein expression in EJM, OPM-2, RPMI-8226, KMS11, KMS18, L363, LP1, JIN3, MM.1S, H929 and U266 cell lines. GAPDH was used as loading control. **G.** Comparison of apoptosis induced by treatment of U266, RPMI-8226 and MM.1S cell lines treated for 48 hrs with SAHA (0.25, 0.5 and 1.0  $\mu$ M), or AR-42 (0.25, 0.5 and 1.0  $\mu$ M). Data expressed as percentages of Annexin V-FITC positive cells. (A–G) All data are representative of three independent sets of experiments.

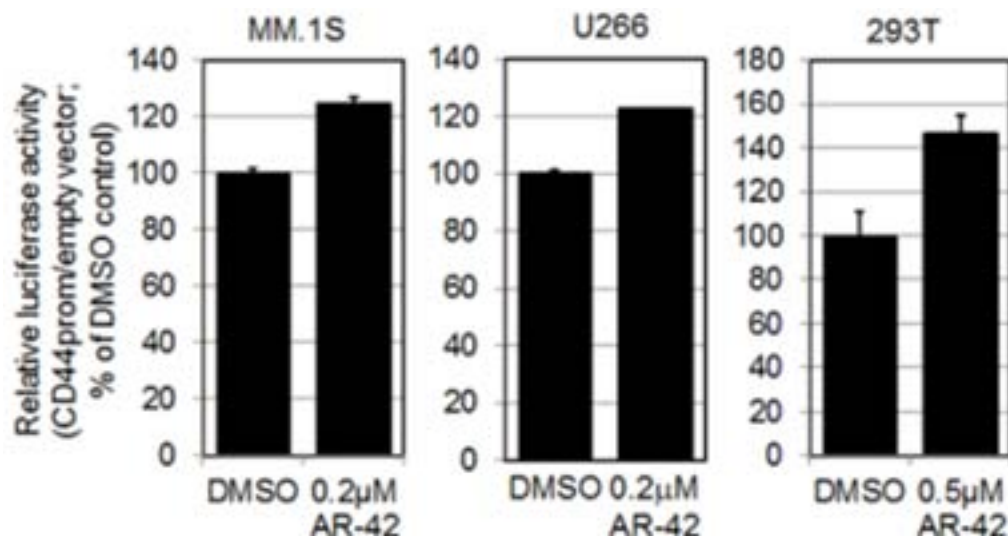

**Supplementary Figure S2: Downregulation of CD44 by AR-42 is not mediated by the promoter region.** MM.1S (left), U266 (middle) and 293T (right) cells were transfected with CD44pGL3 and divided into two populations: one population was treated with vehicle control (DMSO), while the other with AR-42 at indicated concentrations. Cells were harvested 24 hrs later and luciferase activity was measured.

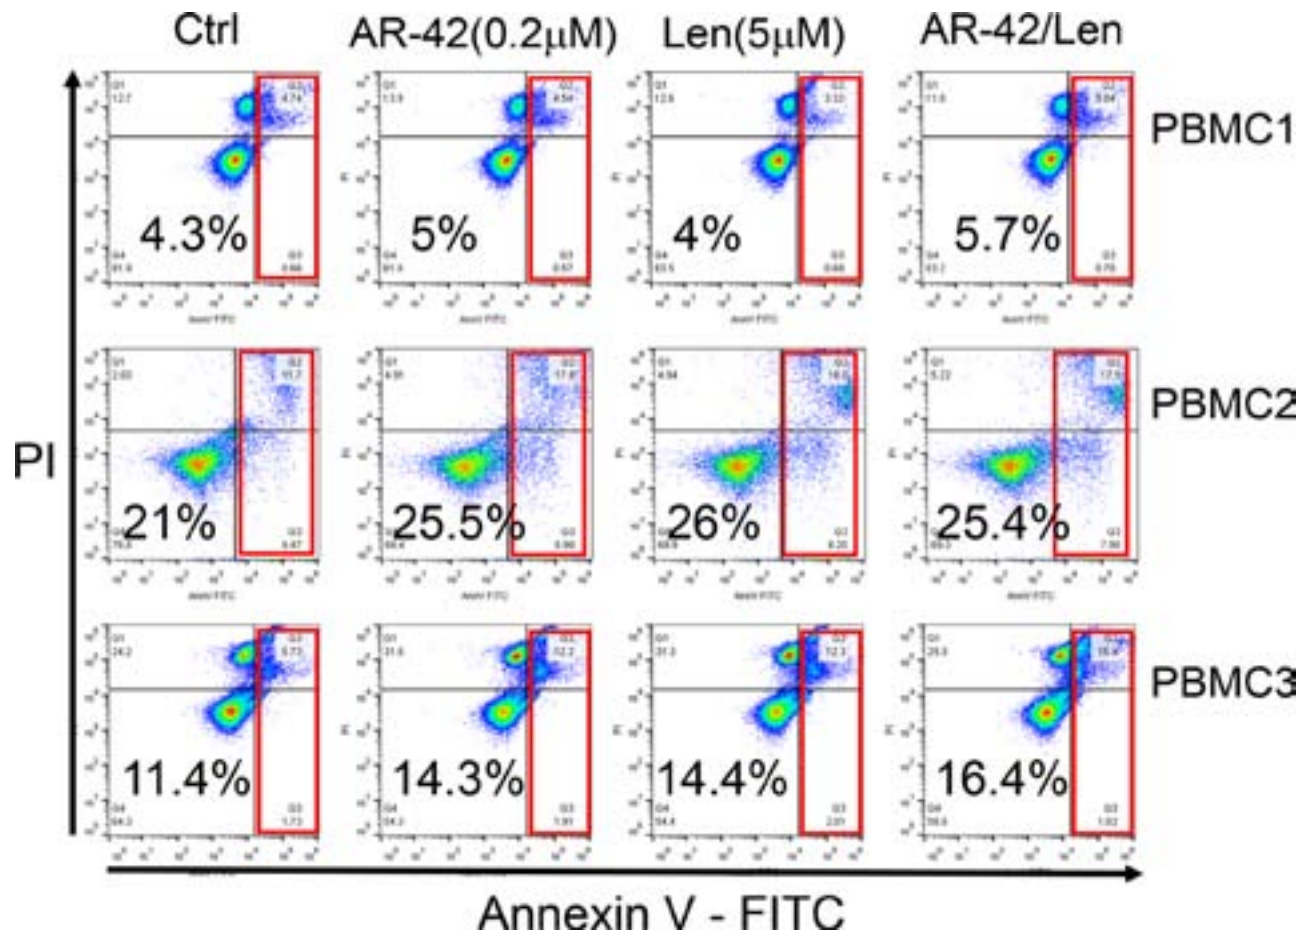

**Supplementary Figure S3: AR-42 and Len alone, or in combination do not induce apoptosis of PBMCs.** PBMCs from 3 MM patients were treated *ex vivo* with 0.2 μM AR-42 and 5 μM Len as single agents or in combination. After 48 hrs of treatment, cells were analyzed for apoptosis by Annexin V-PI staining using flow cytometer.

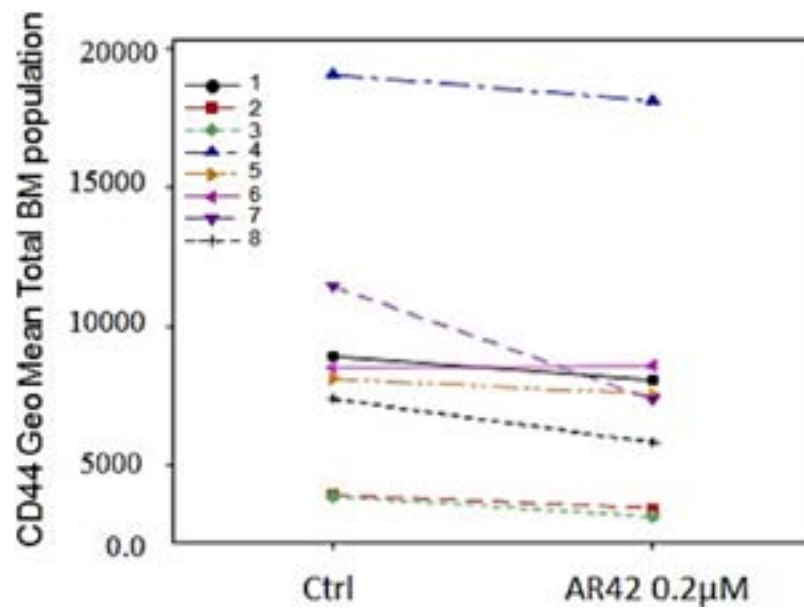

**Supplementary Figure S4: Efficacy of AR-42/Len combination on CD44 levels in total BM.** Total BM specimens from 5 Len-refractory and 3 newly diagnosed MM patients (same as in Figure 5C) were treated with 0.2  $\mu$ M AR-42 for 48 hrs and evaluated for the expression of CD44 by flow cytometry. Values represent the CD44 geo mean.

**Supplementary Table S1: Differentially expressed genes upon AR-42 treatment of MM.1S cells**

| Gene ID  | log2_Fold Change AR-42 vs. Ctrl |
|----------|---------------------------------|
| IRF7     | - 4.15                          |
| CD3EAP   | - 3.60                          |
| ICOSLG   | - 2.09                          |
| TFRC     | - 1.12                          |
| MX1      | - 1.04                          |
| CSF2RB   | - 1.02                          |
| PTPN6    | - 0.93                          |
| ADA      | - 0.75                          |
| TUBB     | - 0.73                          |
| TP53     | - 0.63                          |
| SLAMF7   | - 0.60                          |
| CD44     | - 0.50                          |
| CD28     | - 0.38                          |
| HLA-B    | - 0.10                          |
| HLA-DRA  | 0.14                            |
| APP      | 0.17                            |
| CD164    | 0.33                            |
| CD99     | 0.41                            |
| IRF1     | 0.51                            |
| STAT3    | 0.53                            |
| TNFAIP3  | 0.60                            |
| LITAF    | 0.64                            |
| ITGB1    | 0.79                            |
| MAPKAPK2 | 0.85                            |
| IRAK4    | 0.89                            |
| CCL3     | 1.19                            |
| NFKBIZ   | 1.43                            |
| STAT4    | 1.95                            |
| PTPN22   | 2.20                            |
| CD40     | 2.32                            |
| CXCL10   | 2.49                            |
| CD81     | 5.44                            |
| ABCB1    | 5.57                            |

Unsupervised hierarchical clustering analysis of nCounter® GX Human Immunology assays on MM.1S cells treated with AR-42 0.1  $\mu$ M treatment for 24 hrs. Data are showed as expression of the majority of the immunology-related genes with *p* value < 0.001.

**Supplementary Table S2: Differentially expressed miRNAs upon AR-42 treatment of MM.1S cells**

| microRNA_ID           | 0.1 $\mu$ M vs. Ctrl | Adjusted <i>p</i> -values (0.1 $\mu$ M vs. Ctrl) | 0.2 $\mu$ M vs. Ctrl | Adjusted <i>p</i> -values (0.2 $\mu$ M vs. Ctrl) |
|-----------------------|----------------------|--------------------------------------------------|----------------------|--------------------------------------------------|
| hsa-miR-1973          | 11.45                | 1.13E-04                                         | 4.87                 | 1.41E-04                                         |
| hsa-miR-342-3p        | 9.74                 | 1.75E-03                                         | 9.08                 | 1.20E-04                                         |
| hsa-miR-4516          | 8.09                 | 1.94E-03                                         | 9.30                 | 6.48E-05                                         |
| hsa-miR-4284          | 7.29                 | 2.20E-02                                         | 2.96                 | 4.25E-02                                         |
| hsa-miR-664-3p        | 6.06                 | 6.53E-03                                         | 8.00                 | 1.48E-04                                         |
| hsa-miR-4485          | 5.92                 | 2.18E-02                                         | 4.49                 | 4.99E-03                                         |
| hsa-miR-30a-5p        | 5.46                 | 1.49E-02                                         | 4.65                 | 1.91E-03                                         |
| hsa-miR-575           | 5.28                 | 1.51E-02                                         | 5.28                 | 1.09E-03                                         |
| hsa-miR-22-3p         | 5.22                 | 9.03E-04                                         | 4.98                 | 5.73E-05                                         |
| hsa-miR-494           | 4.44                 | 1.51E-02                                         | 5.22                 | 5.08E-04                                         |
| hsa-miR-630           | 4.19                 | 1.64E-04                                         | 2.58                 | 1.93E-04                                         |
| hsa-miR-30d-5p        | 3.65                 | 1.43E-03                                         | 2.83                 | 3.98E-04                                         |
| hsa-miR-146a-5p       | 2.70                 | 1.13E-04                                         | 2.83                 | 3.18E-06                                         |
| hsa-miR-26b-5p        | 2.67                 | 1.28E-05                                         | 2.73                 | 2.42E-07                                         |
| hsa-miR-320e          | 2.58                 | 2.14E-02                                         | 2.14                 | 6.35E-03                                         |
| hsa-miR-361-3p        | 2.43                 | 4.27E-03                                         | 2.67                 | 1.31E-04                                         |
| hsa-miR-30e-5p        | 2.27                 | 1.30E-03                                         | 2.12                 | 1.32E-04                                         |
| hsa-miR-186-5p        | 1.95                 | 1.30E-02                                         | 2.58                 | 6.35E-05                                         |
| hsa-miR-9-5p          | 1.82                 | 4.93E-02                                         | 2.00                 | 1.84E-03                                         |
| hsa-miR-30b-5p        | 1.68                 | 3.43E-03                                         | 1.43                 | 2.84E-03                                         |
| hsa-miR-548aa         | 0.46                 | 1.09E-02                                         | 1.52                 | 2.75E-02                                         |
| hsa-miR-1244          | 0.45                 | 3.45E-02                                         | 1.25                 | 3.08E-01                                         |
| hsa-miR-93-5p         | 0.44                 | 1.12E-04                                         | 0.39                 | 1.16E-06                                         |
| hsa-miR-19b-3p        | 0.44                 | 7.53E-05                                         | 0.49                 | 6.25E-06                                         |
| hsa-miR-20a-5p+20b-5p | 0.41                 | 1.13E-04                                         | 0.45                 | 1.16E-05                                         |
| hsa-miR-200c-3p       | 0.40                 | 3.26E-03                                         | 0.91                 | 5.73E-01                                         |
| hsa-miR-365a-3p       | 0.39                 | 3.26E-03                                         | 0.94                 | 7.27E-01                                         |
| hsa-miR-301a-3p       | 0.36                 | 2.72E-04                                         | 0.49                 | 2.04E-04                                         |
| hsa-miR-18a-5p        | 0.36                 | 7.75E-05                                         | 0.47                 | 2.91E-05                                         |
| hsa-miR-644a          | 0.35                 | 2.58E-02                                         | 1.59                 | 1.01E-01                                         |
| hsa-miR-548ah-5p      | 0.33                 | 3.06E-02                                         | 2.32                 | 1.21E-02                                         |
| hsa-miR-106a-5p+17-5p | 0.33                 | 5.10E-07                                         | 0.36                 | 3.46E-08                                         |
| hsa-miR-423-3p        | 0.33                 | 1.51E-02                                         | 1.20                 | 4.64E-01                                         |
| hsa-miR-92a-3p        | 0.28                 | 2.03E-04                                         | 0.33                 | 2.77E-05                                         |
| hsa-miR-4455          | 0.27                 | 3.07E-02                                         | 1.18                 | 6.35E-01                                         |

(Continued)

| microRNA_ID     | 0.1 $\mu$ M vs. Ctrl | Adjusted <i>p</i> -values (0.1 $\mu$ M vs. Ctrl) | 0.2 $\mu$ M vs. Ctrl | Adjusted <i>p</i> -values (0.2 $\mu$ M vs. Ctrl) |
|-----------------|----------------------|--------------------------------------------------|----------------------|--------------------------------------------------|
| hsa-miR-223-3p  | 0.24                 | 2.66E-02                                         | 1.22                 | 5.83E-01                                         |
| hsa-miR-335-5p  | 0.24                 | 2.12E-02                                         | 1.57                 | 2.05E-01                                         |
| hsa-miR-4454    | 0.23                 | 2.82E-02                                         | 0.78                 | 5.24E-01                                         |
| hsa-miR-720     | 0.21                 | 3.45E-02                                         | 0.74                 | 4.66E-01                                         |
| hsa-miR-193b-3p | 0.20                 | 3.40E-04                                         | 1.43                 | 1.07E-01                                         |
| hsa-miR-450a-5p | 0.18                 | 3.26E-03                                         | 0.93                 | 8.17E-01                                         |
| hsa-miR-411-5p  | 0.17                 | 5.84E-04                                         | 1.46                 | 1.35E-01                                         |
| hsa-miR-221-3p  | 0.13                 | 2.76E-04                                         | 0.53                 | 3.16E-02                                         |
| hsa-miR-3676-3p | 0.07                 | 1.69E-05                                         | 0.60                 | 3.89E-02                                         |
| hsa-miR-126-3p  | 0.07                 | 2.10E-07                                         | 0.30                 | 3.77E-06                                         |

Unsupervised hierarchical clustering analysis of global miRNA expression in MM.1S cells treated by 0.1  $\mu$ M, or 0.2  $\mu$ M AR-42 for 24 hours and compared to DMSO treated cells (Ctrl).

**Supplementary Table S3: Combinatorial index (CI) of AR-42 + Len**

| AR-42 ( $\mu$ M) | Len ( $\mu$ M) | CI   |
|------------------|----------------|------|
| 0.1              | 2.5            | 0.52 |
| 0.1              | 5.0            | 0.45 |
| 0.1              | 10.0           | 0.42 |
| 0.2              | 2.5            | 0.48 |
| 0.2              | 5.0            | 0.43 |
| 0.2              | 10.0           | 0.35 |

Proliferation MTT assay was performed on MM.1S cells treated with AR-42 (50 nM, or 100 nM) in combination with lenalidomide (Len; 1  $\mu$ M, 2.5  $\mu$ M, 5  $\mu$ M, and 10  $\mu$ M). Combinatorial indices (CI) were calculated by the Chou-Talalay method. All data are expressed as mean of three independent sets of experiments.
